# Supplementary material
Source: MDPI journal article supplement (https://www.mdpi.com/2071-1050/11/1/245)
Supplement: s1 [file s1]

## Model 1.2

|                           |   | Actual Type    |     |     |     |     |     |     |
|---------------------------|---|----------------|-----|-----|-----|-----|-----|-----|
|                           |   | 1              | 2   | 3   | 4   | 5   | 6   | 7   |
| Positive Predictive Value | 1 | 42%            | 2%  |     |     |     |     |     |
|                           | 2 | 11%            | 93% |     |     |     |     | 2%  |
|                           | 3 | 5%             |     | 96% |     | 13% |     |     |
|                           | 4 | 11%            | 2%  |     | 90% |     | <1% | <1% |
|                           | 5 | 5%             |     | 4%  |     | 75% |     |     |
|                           | 6 | 21%            | <1% |     | 7%  | 13% | 98% | 1%  |
|                           | 7 | 5%             | 2%  |     | 2%  |     | 2%  | 97% |
|                           |   |                |     |     |     |     |     |     |
|                           |   | 1              | 2   | 3   | 4   | 5   | 6   | 7   |
|                           |   | Predicted Type |     |     |     |     |     |     |
