# Supplementary material
Source: MDPI journal article supplement (https://www.mdpi.com/2071-1050/11/1/245)
Supplement: s1 [file s1]

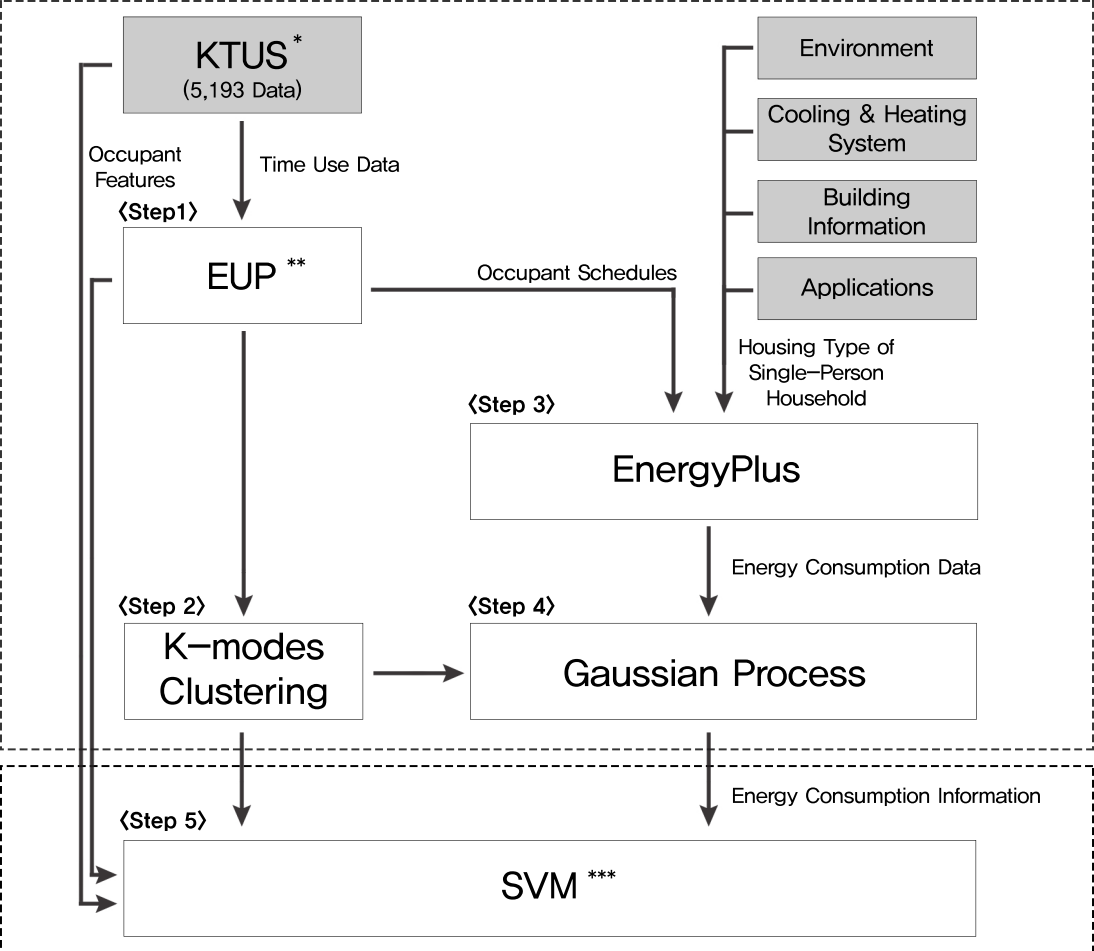

## A Model for Predicting Energy Usage Pattern's Type with Energy Consumption Information

\* Korean Time Use Survey

\*\* Energy Usage Pattern

\*\*\* Support Vector Machine
