# Supplementary material
Source: MDPI journal article supplement (https://www.mdpi.com/2071-1050/11/1/245)
Supplement: s1 [file s1]

Archive with 14 entries (14 files):
- Figure 1.pdf
- Figure 2.pdf
- Figure 3.pdf
- Figure 4(a).pdf
- Figure 4(b).pdf
- Figure 4(c).pdf
- Figure 5.pdf
- Figure 6.pdf
- Figure 7.pdf
- Figure 8.pdf
- Figure 9.pdf
- Figure S1.pdf
- Figure S2.pdf
- Figure S3.pdf
