# Supplementary material
Source: MDPI journal article supplement (https://www.mdpi.com/2071-1050/11/1/245)
Supplement: s1 [file s1 › Figure 2.pdf]

[Raw Data]

[Location]

[Energy Source]

[Applications]

[EUP Codes]

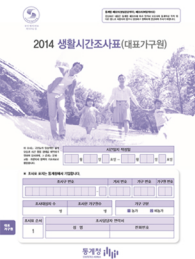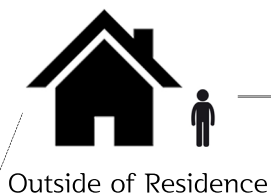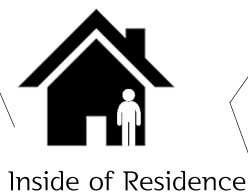

Electricity

Gas

Lighting

Computer

TV

Washing  
machine

Refrigerator

Gas range

Hot water

Away (A1)

Sleeping (S1)

Other (O1)

Leisure (L1)

Laundry (L2)

Cooking (C1)

Grooming (G1)

Dishwashing(D1)
