# Supplementary material
Source: MDPI journal article supplement (https://www.mdpi.com/2071-1050/11/1/245)

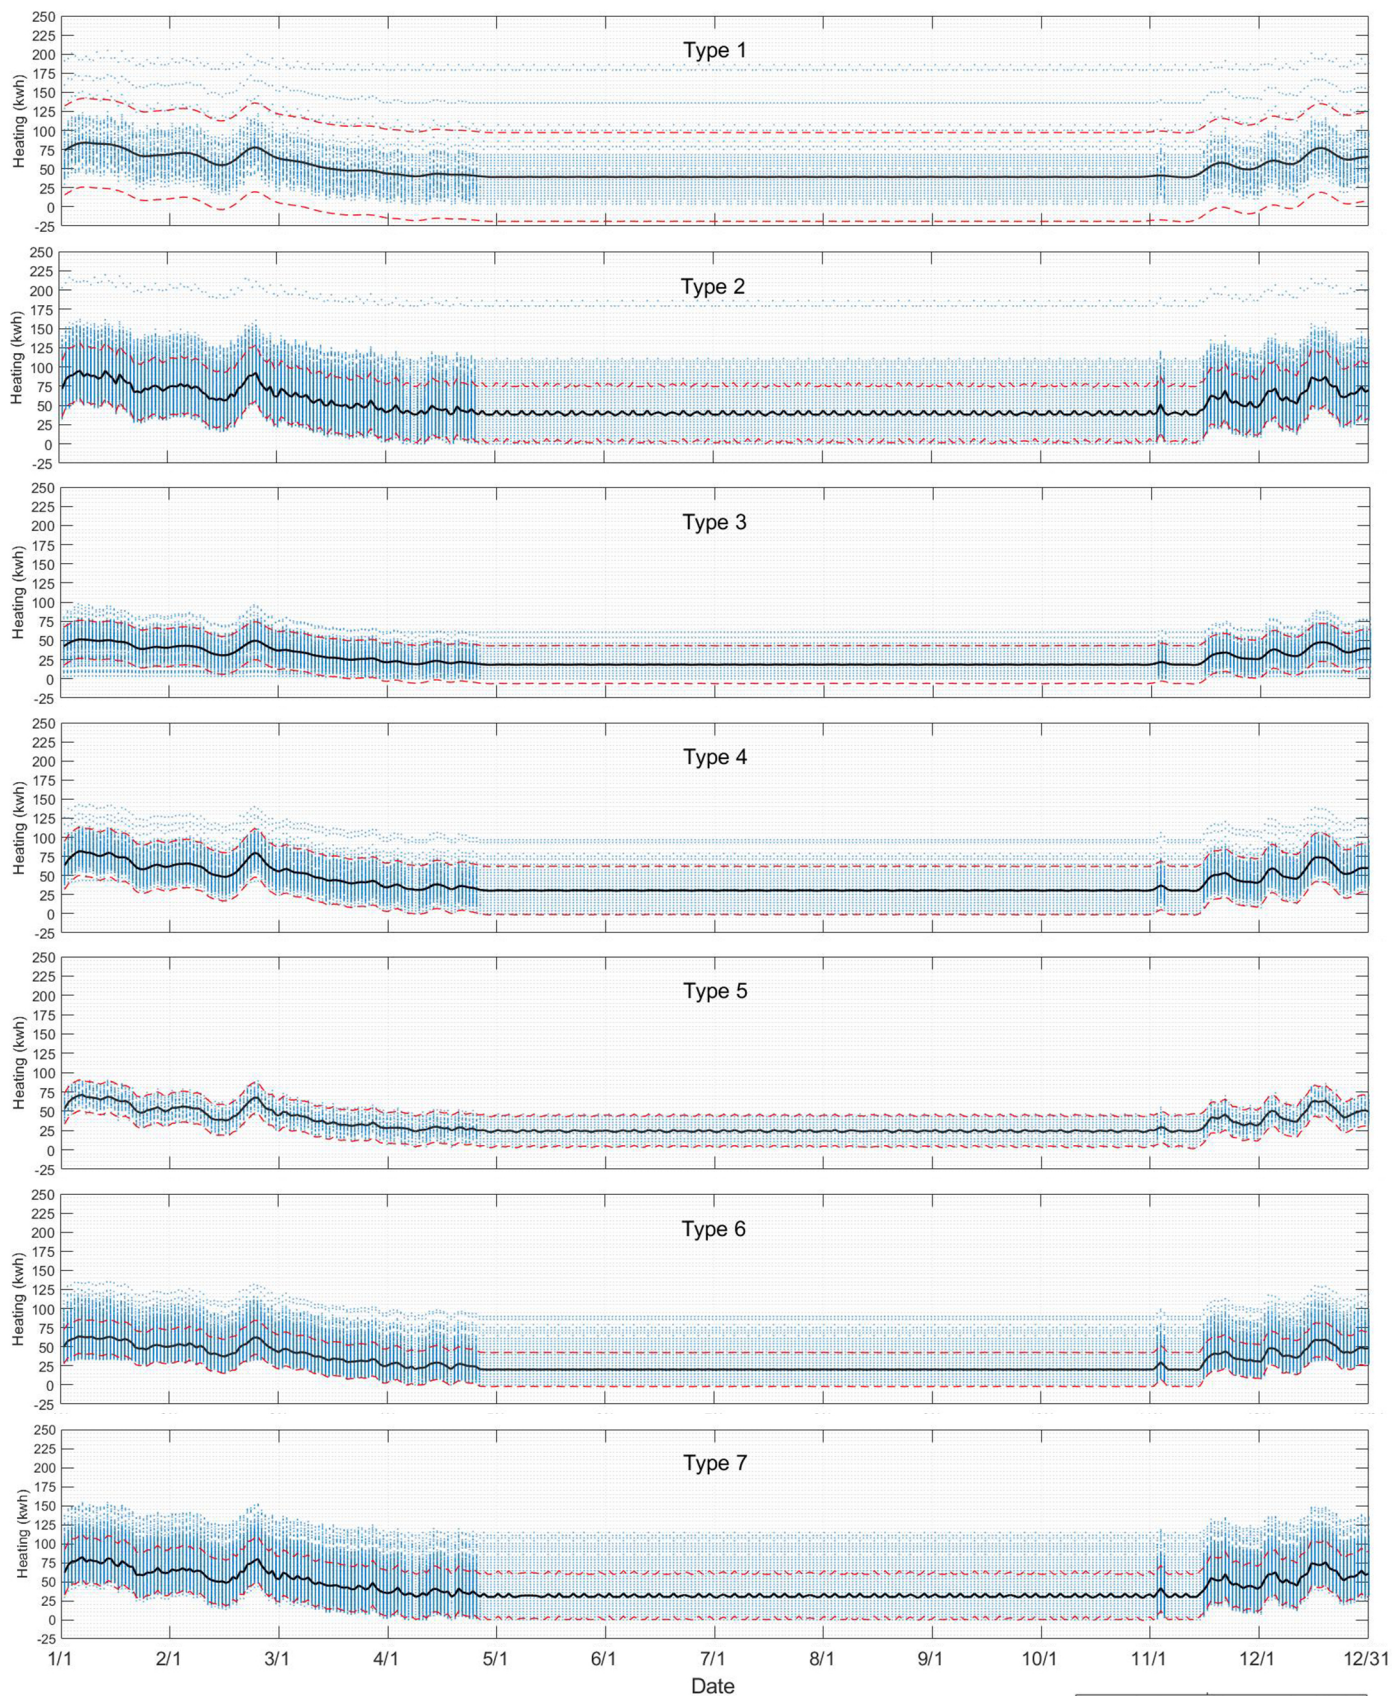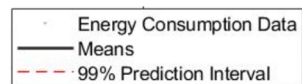

Supplement: s1 [file s1]

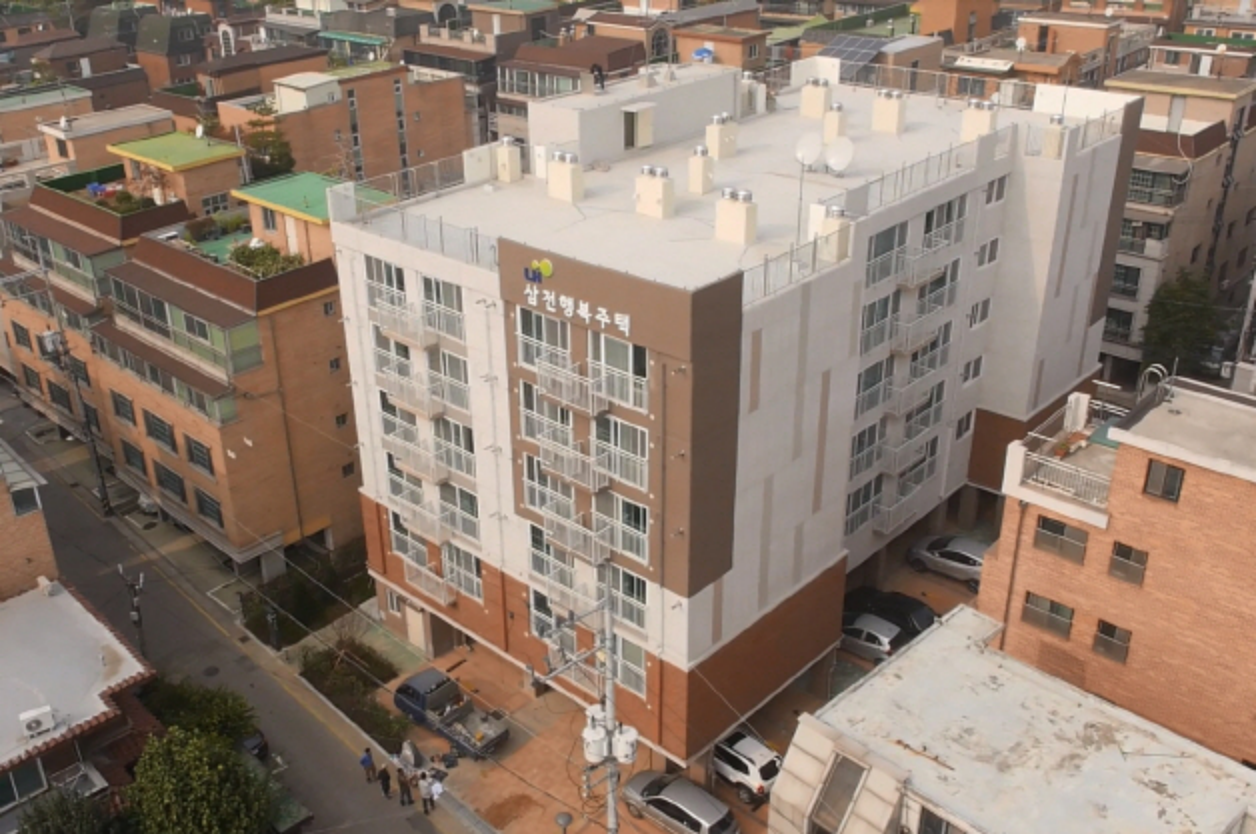

삼전행복주택

Supplement: s1 [file s1]

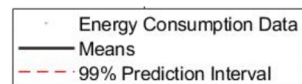

Supplement: s1 [file s1]

Elbow curve

Within Cluster Simple Matching Distance Summed

450,000  
400,000  
350,000  
300,000  
250,000  
200,000  
150,000  
100,000  
50,000  
0

1 2 3 4 5 6 7 8 9 10 11 12 13 14 15 16 17 18 19 20

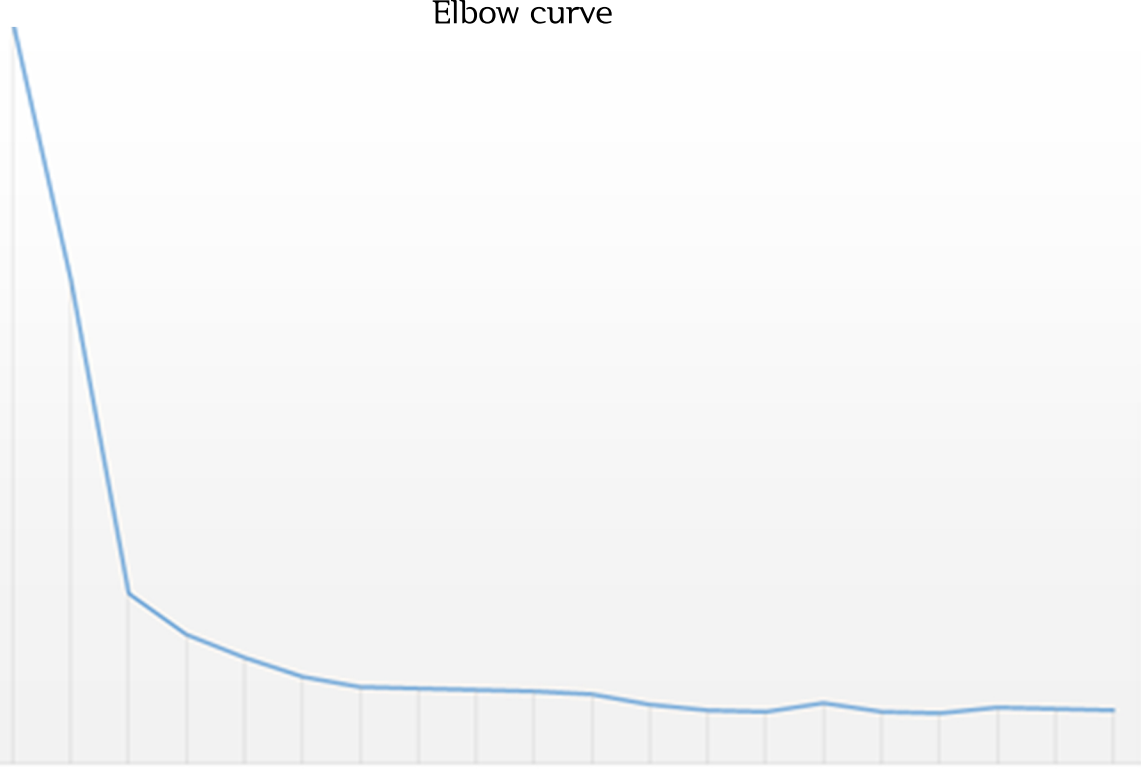

Supplement: s1 [file s1]

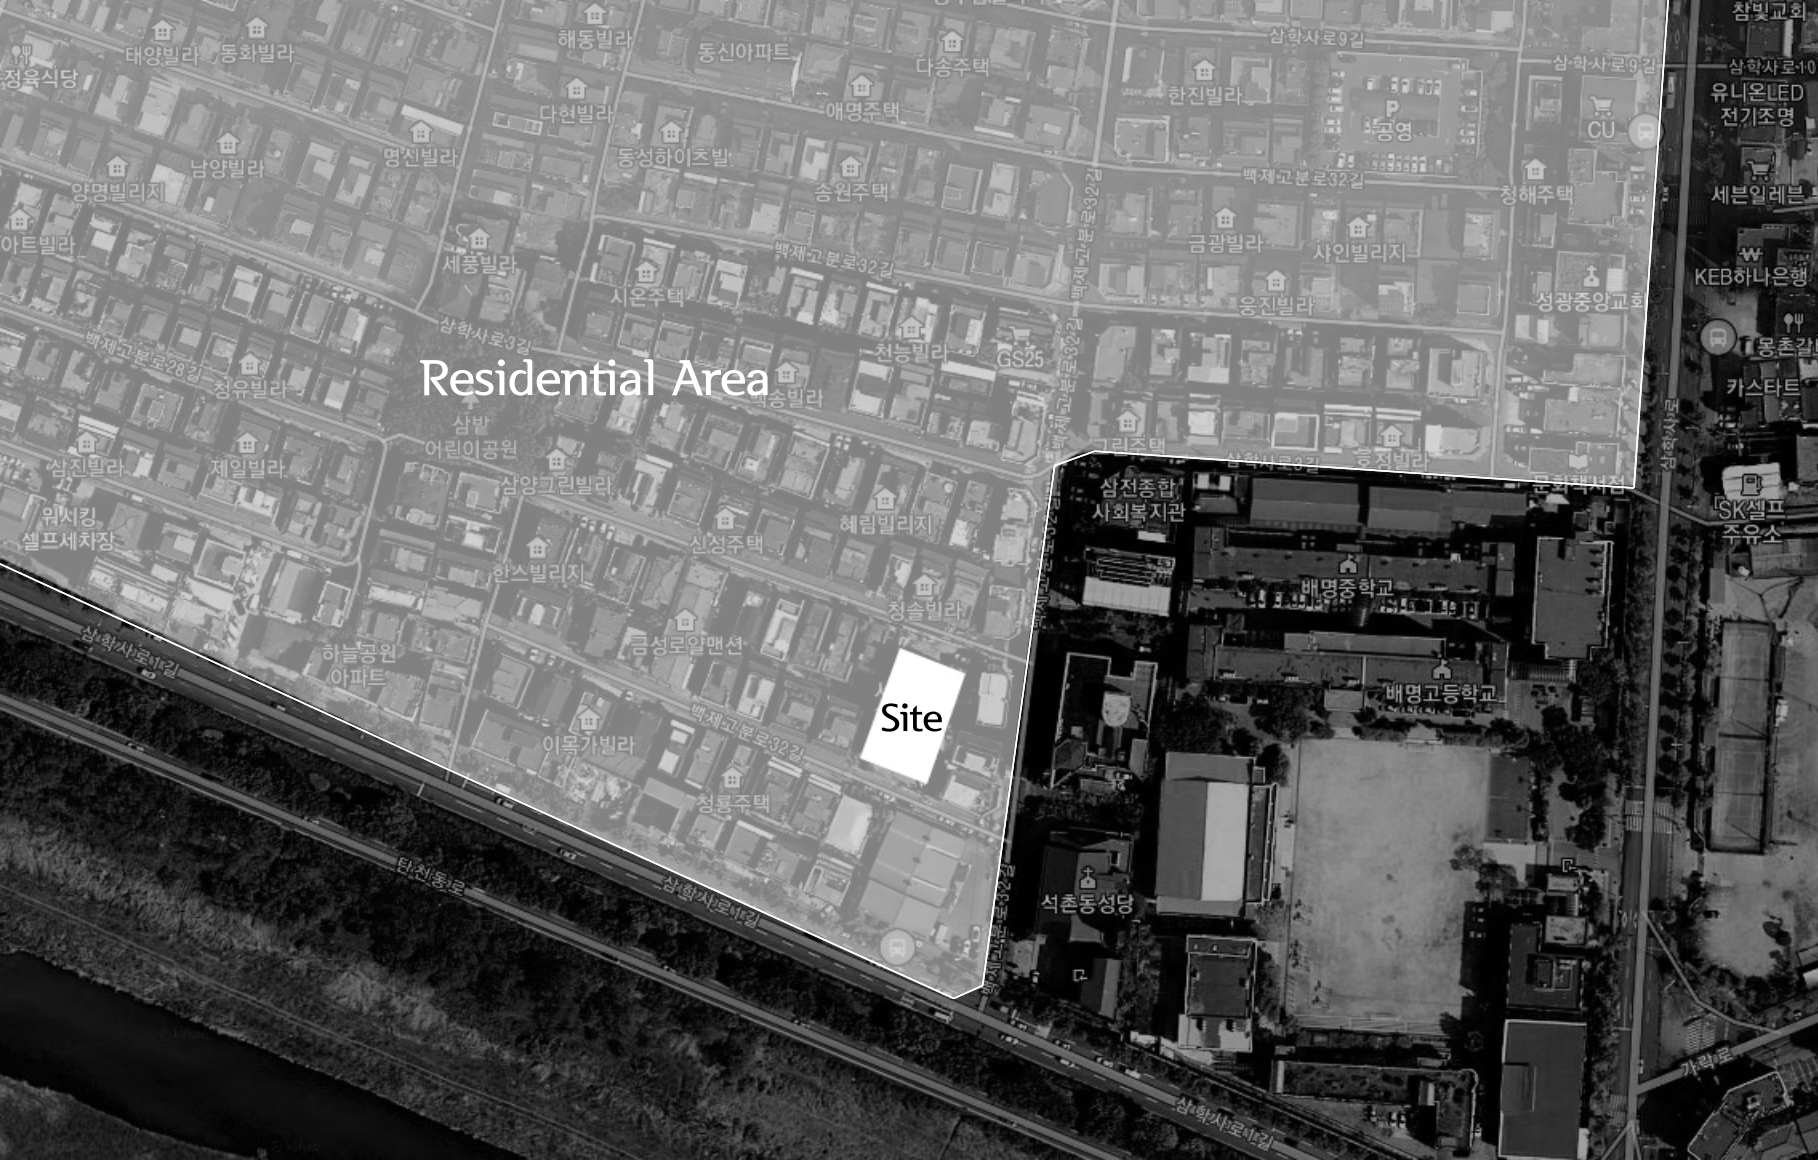

Residential Area

Site

Supplement: s1 [file s1]

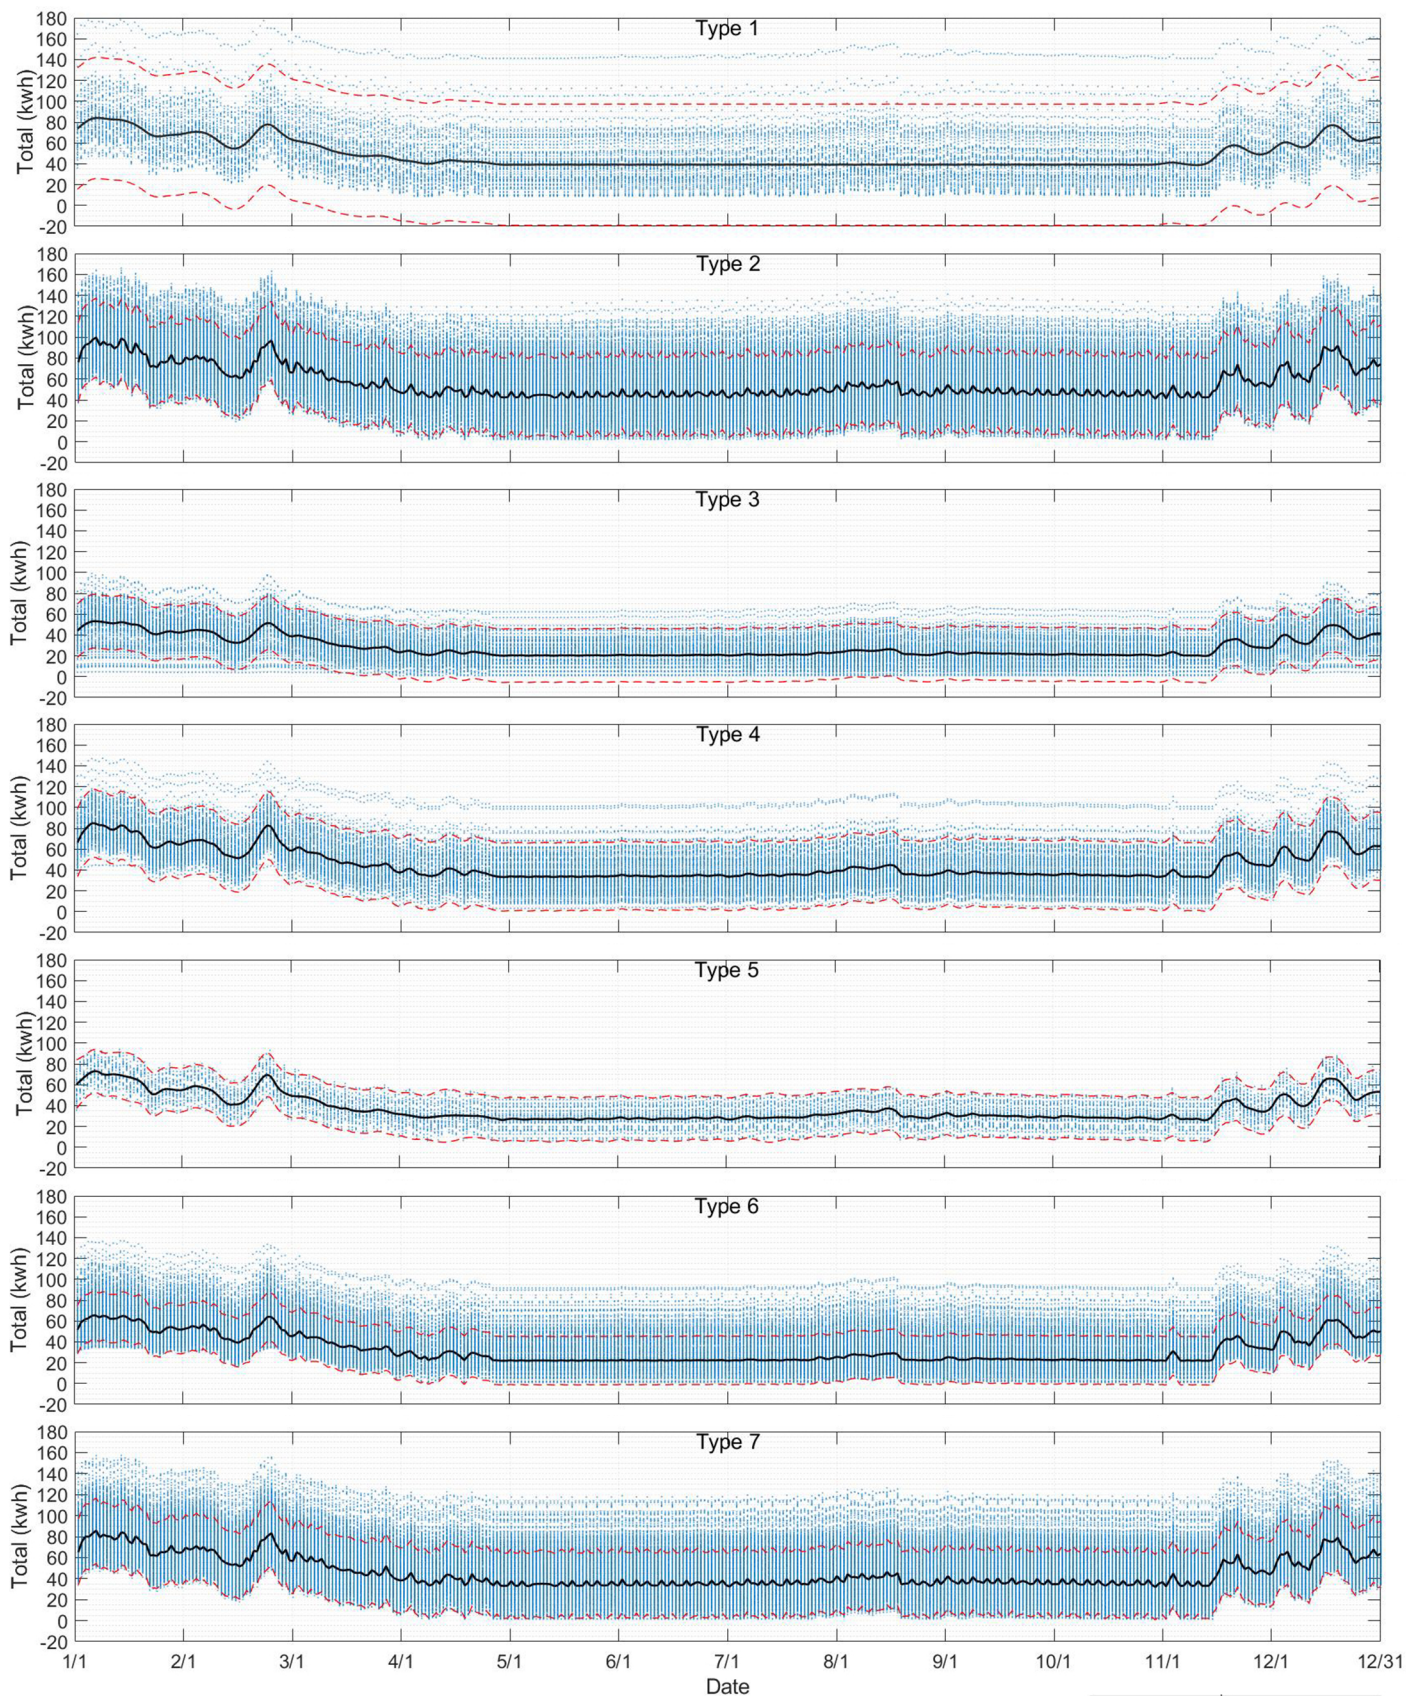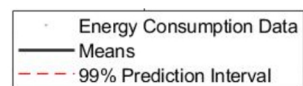

Supplement: s1 [file s1]

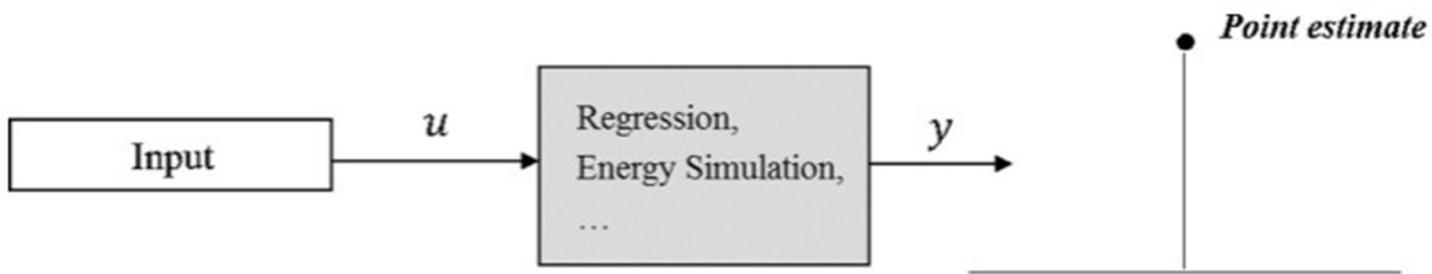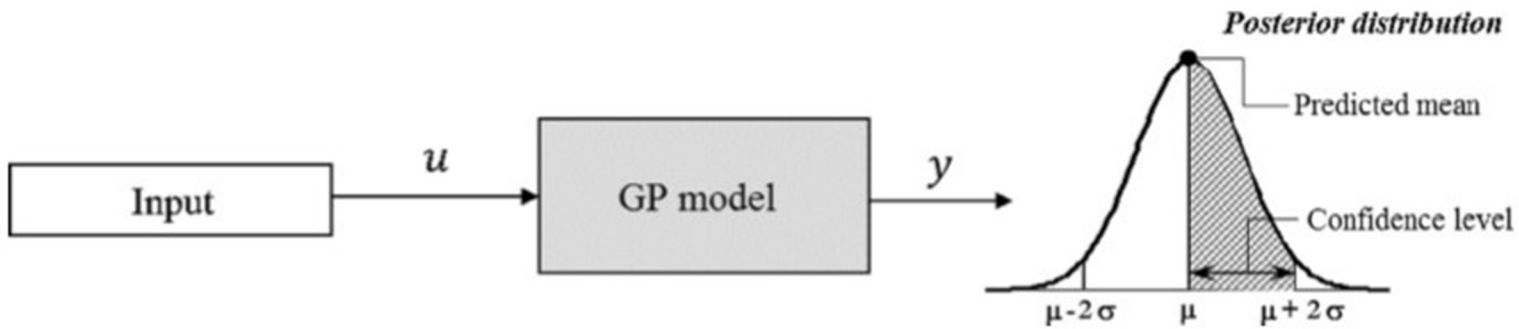

Supplement: s1 [file s1]

41 m<sup>2</sup>  
TYPE

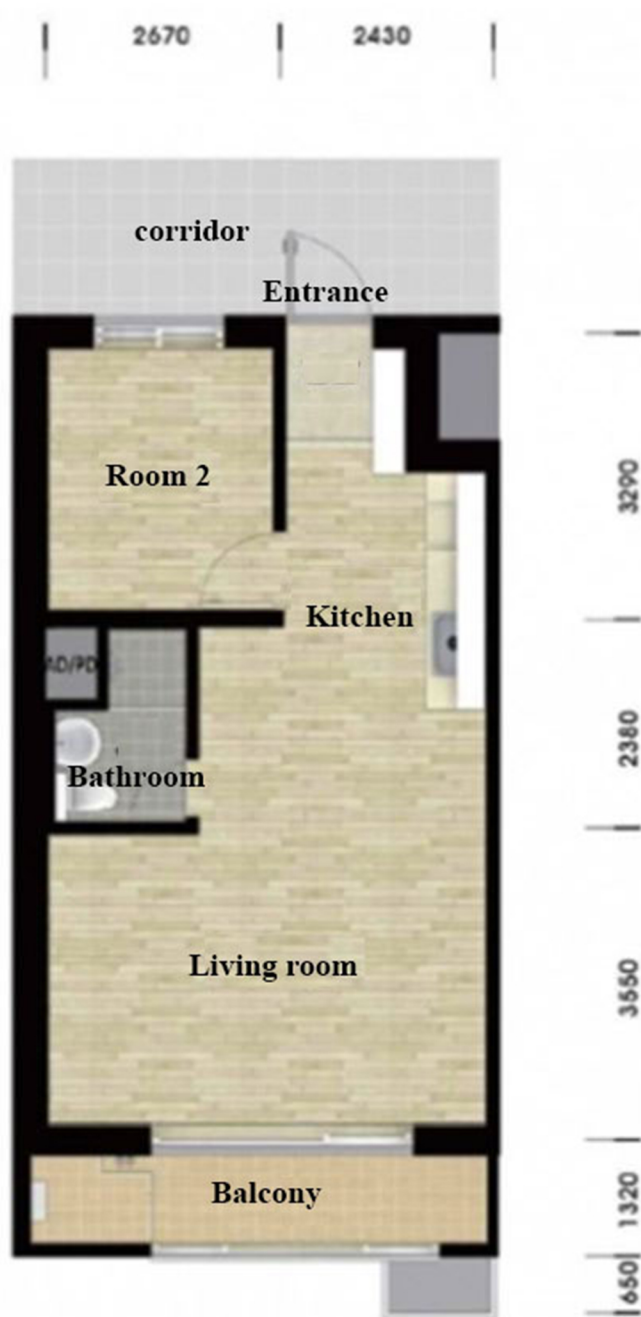

Supplement: s1 [file s1]

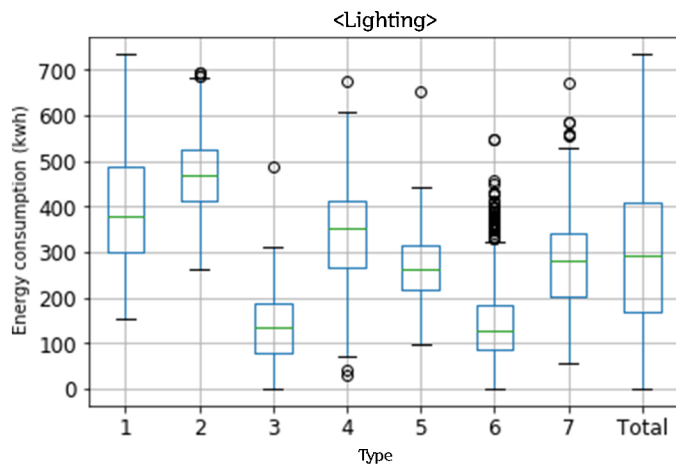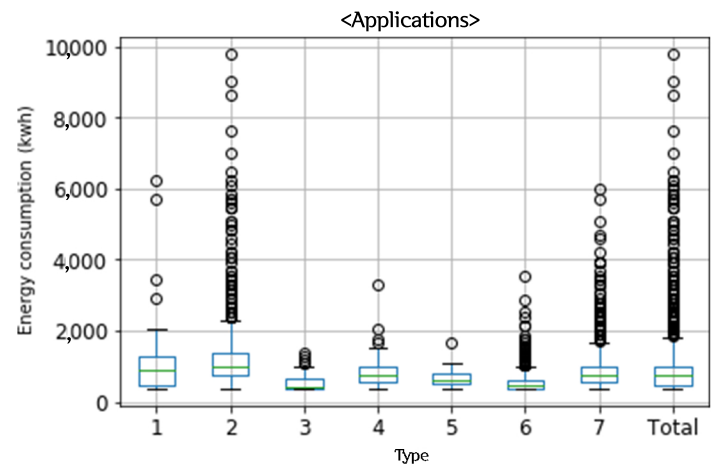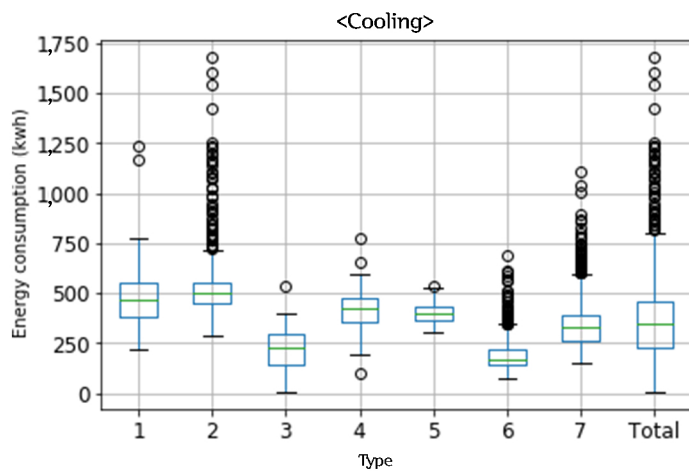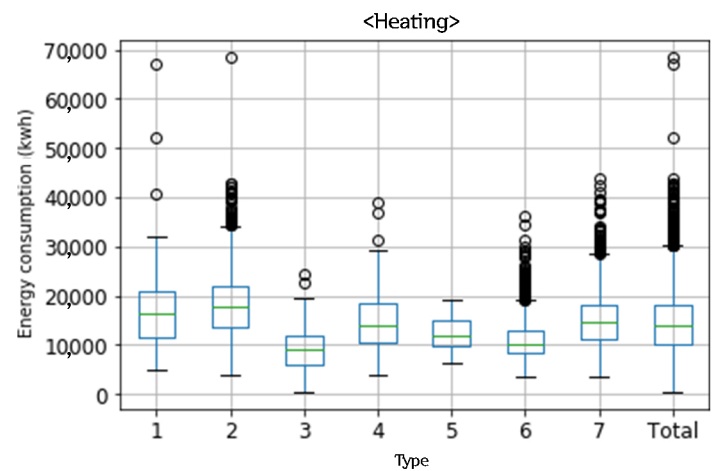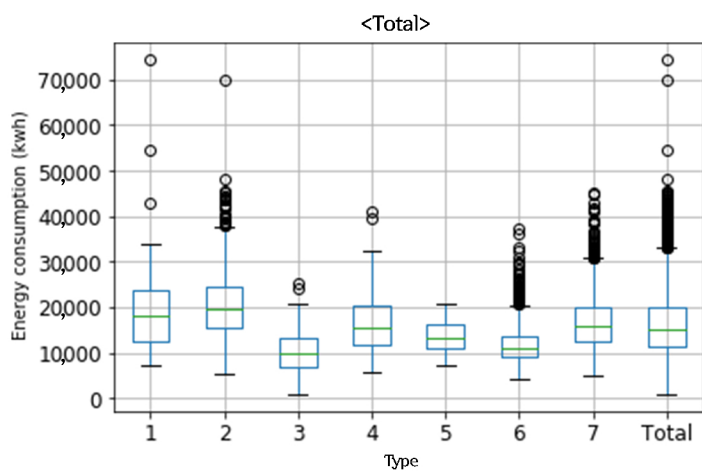

## How to interpret the boxplot ?

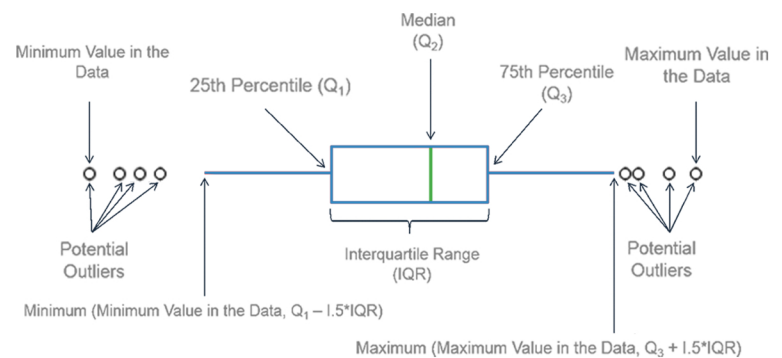

Supplement: s1 [file s1]

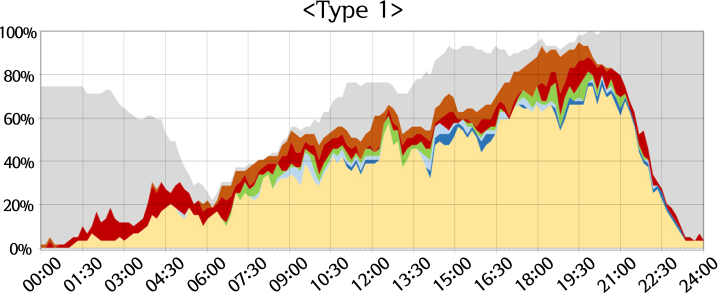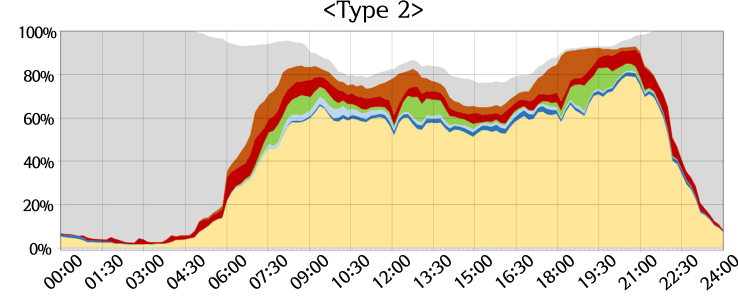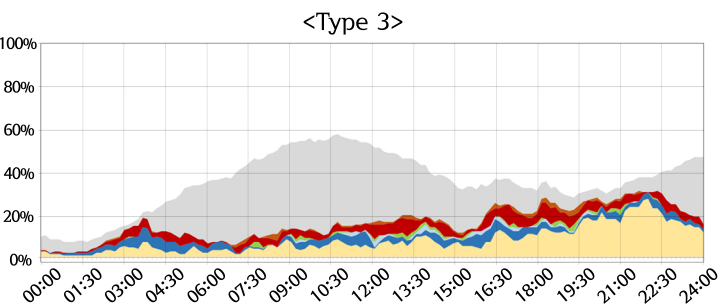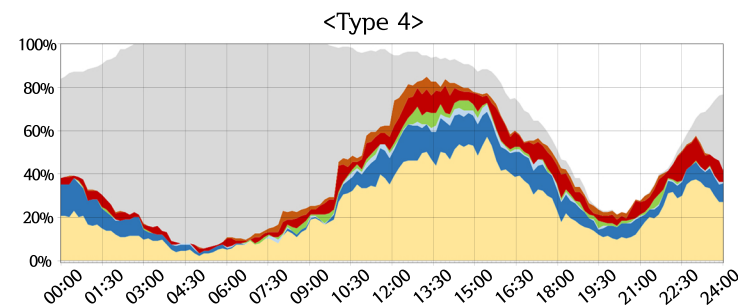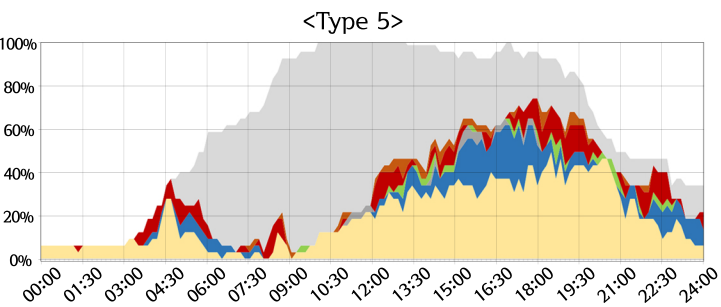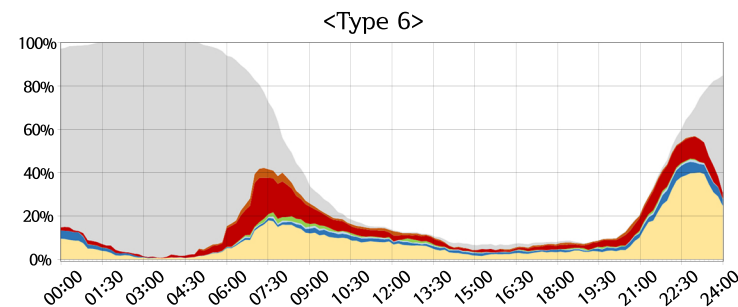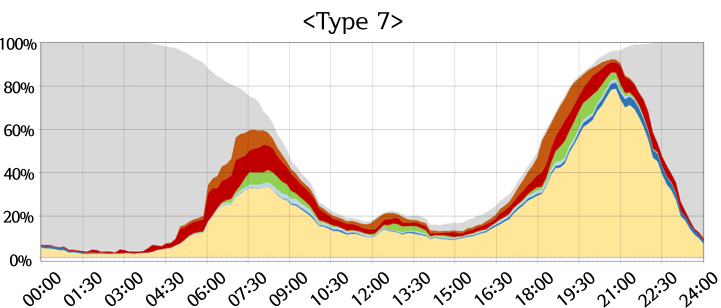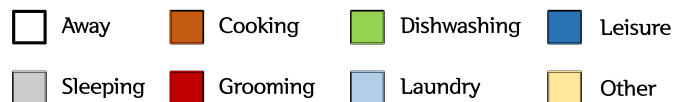

Supplement: s1 [file s1 › Figure 7.pdf]
